# Supplementary material for: A Synergistic Effect of Reactive Oxygen and Reactive Nitrogen Species in Plasma Activated Liquid Media Triggers Astrocyte Wound Healing
Source: PubMed Central journal article supplement (PMC7247562; doi:10.3390/ijms21093343), 2020-05-08

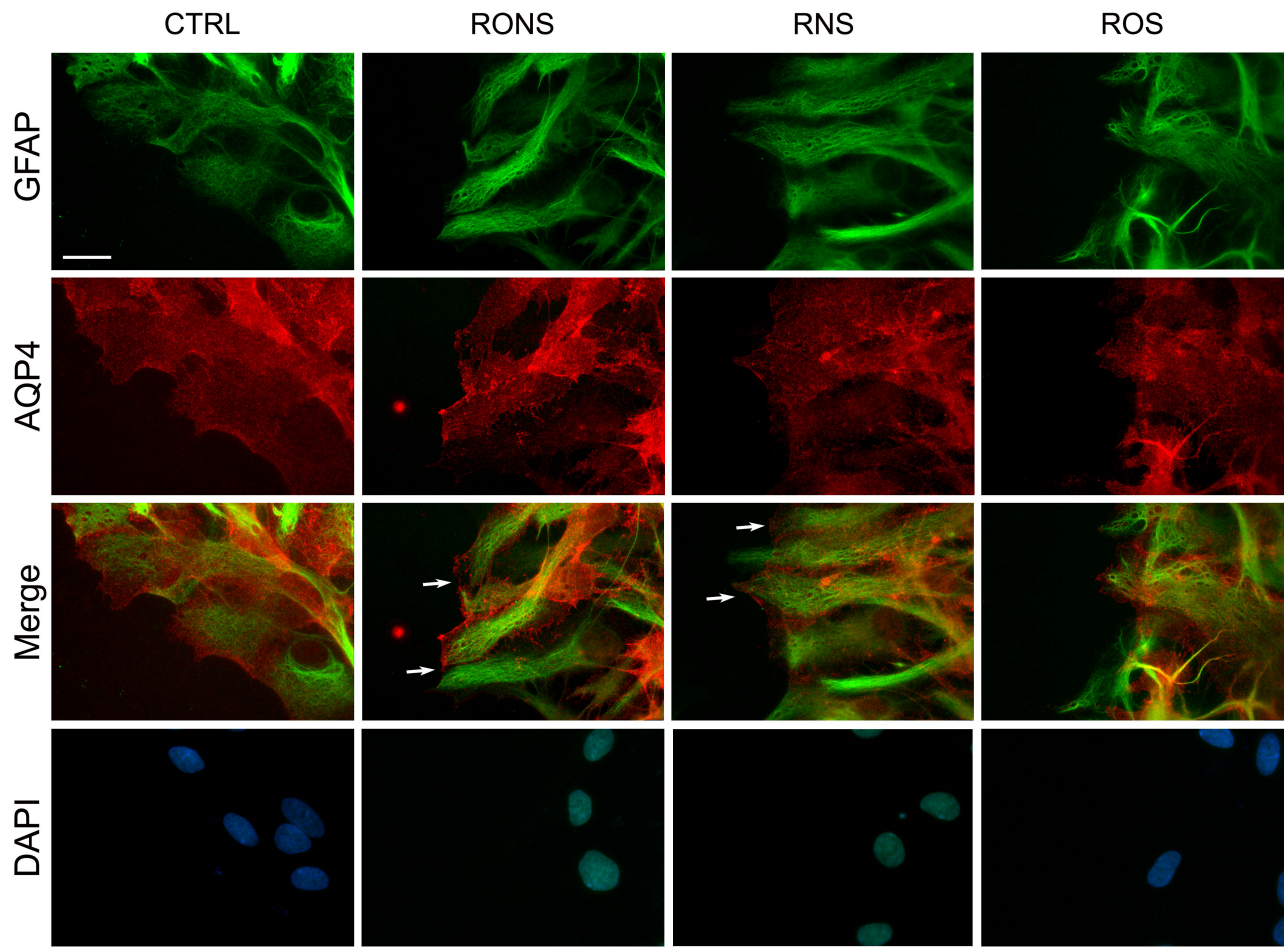

Supplement: ijms-21-03343-s001.pdf [file ijms-21-03343-s001.pdf]
